# Supplementary material
Source: PubMed Central journal article supplement (PMC4152908)
Supplement: supp_mol.114.093286_SupplementSKA121_93286.pdf [file supp_mol.114.093286_SupplementSKA121_93286.pdf]

**Supplemental Data for *Molecular Pharmacology* article:**

**New Positive  $K_{Ca}$  Channel Gating Modulators with Selectivity for  $K_{Ca3.1}$**

Nichole Coleman, Brandon M. Brown, Aida Oliván-Viguera, Vikrant Singh, Marilyn M. Olmstead,  
Marta Sofia Valero, Ralf Köhler, Heike Wulff

*Department of Pharmacology (N.C., B.M.B., V.S., H.W.), School of Medicine, and Department of Chemistry (M.M.O.), University of California, Davis, California, USA; Aragon Institute of Health Sciences I+CS/IIS and ARAID, Zaragoza, Spain (A.O.-V., R.K.); and GIMACES, Faculty of Health Sciences, Universidad San Jorge, Villanueva de Gállego, Spain (M.S.V.)*

This file contains:

1 Supplemental Figure showing the hydrogen bonding pattern of SKA-120 and SKA-121

1 Supplemental Figure showing QPatch recordings of  $Na_V1.2$  and  $Na_V1.5$  currents

1 Supplemental Figure showing telemetric blood pressure measurements after i.p. injection of 30 mg/kg SKA-111, SKA-121

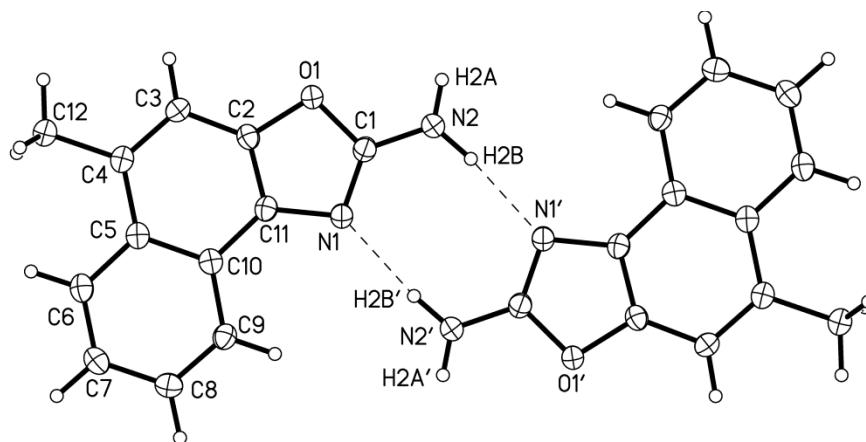

Hydrogen bonding scheme for SKA-120

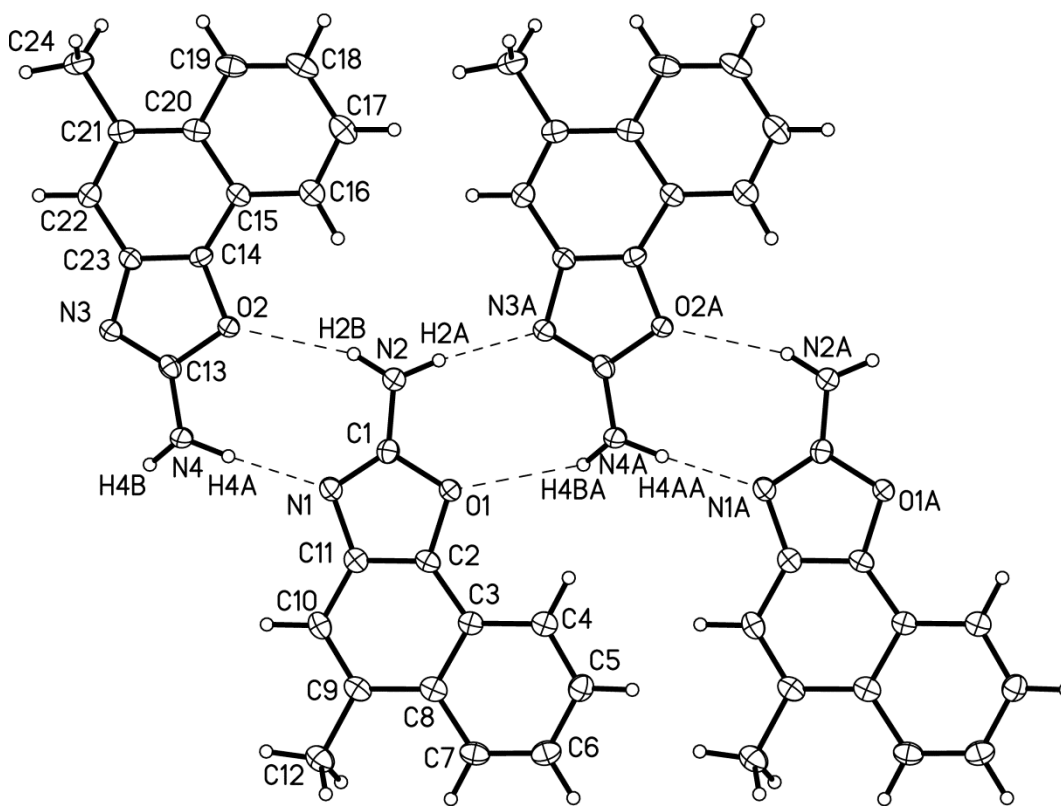

Hydrogen bonding scheme for SKA-121

**Supplemental Figure 1:**

Differences in the hydrogen bonding pattern in the crystal structures of SKA-120 and SKA-121.

## Supplemental Figure 2:

Representative sweep plots of QPatch  $\text{Na}_v1.2$  recordings from N1E-115 neuroblastoma and  $\text{Na}_v1.5$  recordings from HEK-293 cells. Currents were elicited by 20 ms pulses from  $-90$  mV to  $0$  mV applied every 10 sec with a KF-based internal solution and normal Ringer as an external solution.

### $\text{Na}_v1.2$ (N1E-115 cells)

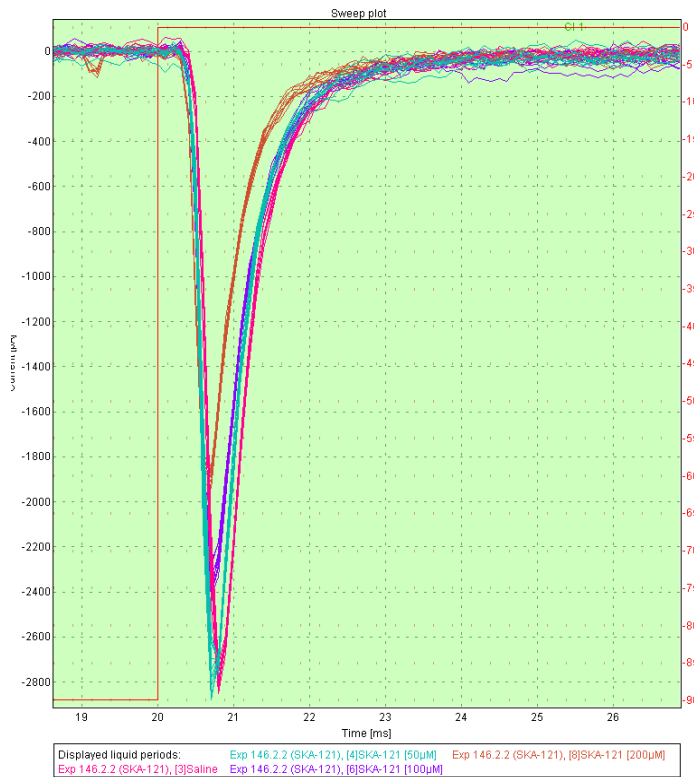

### $\text{Na}_v1.5$ (HEK-293 cells)

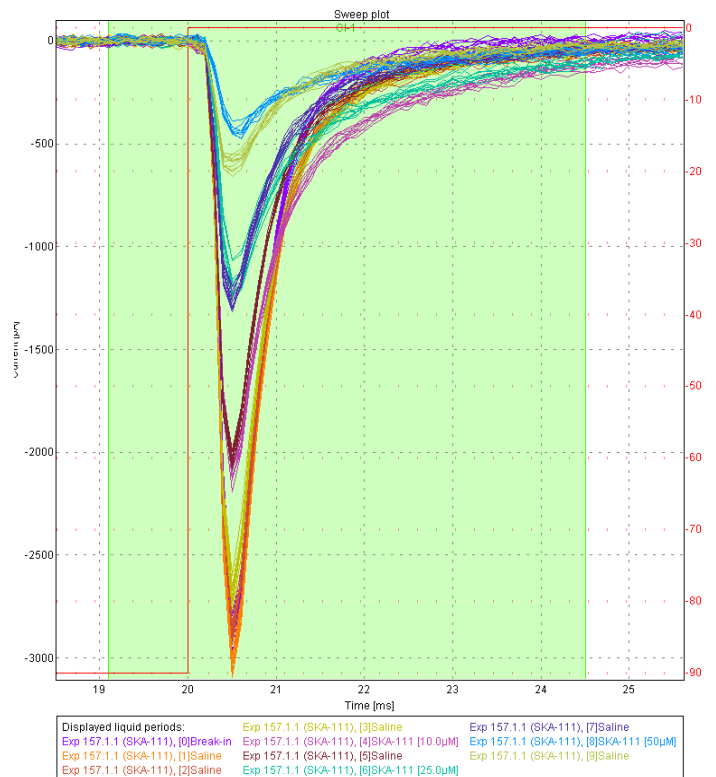

**SKA-111  
(30 mg/kg)**

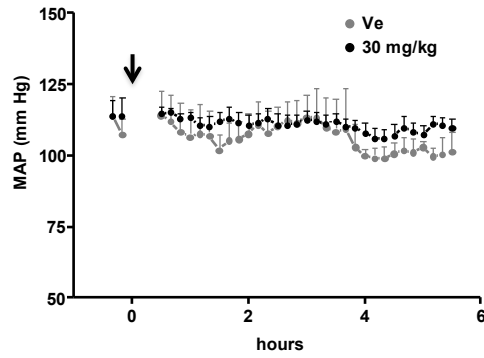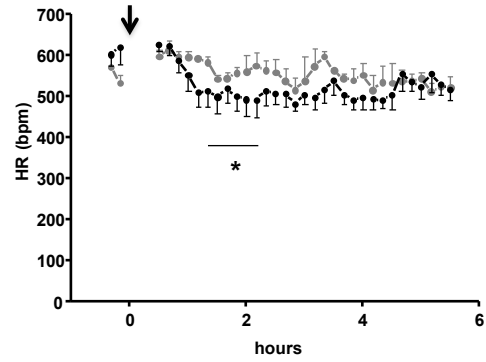

**SKA-121  
(30 mg/kg)**

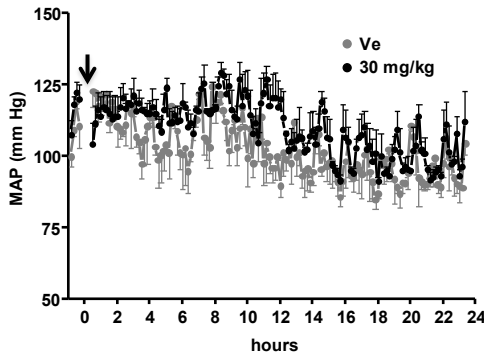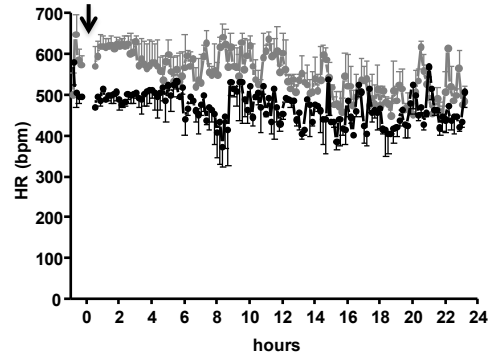

**Supplemental Figure 3:**

Telemetric blood pressure measurements after i.p. injection of 30 mg/kg SKA-111, SKA-121, or vehicle (Ve). Note that only SKA-111 moderately reduced heart rate (HR) at 2 h after injection while SKA-111 or SKA-121 did not change mean arterial pressure (MAP). Data points are means  $\pm$  SEM; n = 3-4 per group. Line in right panel on top indicates time period when HR was significantly different from Ve. \* $<0.05$ , unpaired Student T-test.
